# Supplementary material for: Genome-Wide Identification of SnRK1 Catalytic α Subunit and FLZ Proteins in Glycyrrhiza inflata Bat. Highlights Their Potential Roles in Licorice Growth and Abiotic Stress Responses
Source: MDPI journal article supplement (doi:10.3390/ijms24010121), 2022-12-21
Supplement: s1 [file s1]

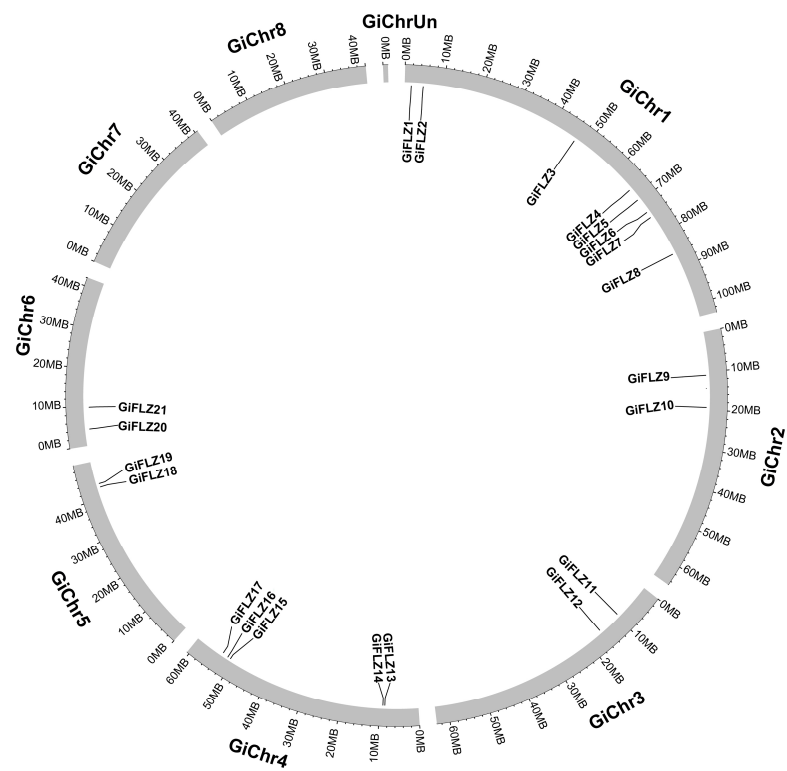

Figure S1. Chromosomal localization of *GiFLZ* genes in *G. inflata*.

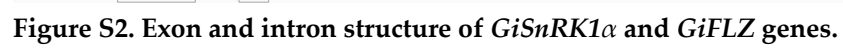

**Figure S2. Exon and intron structure of *GiSnRK1α* and *GiFLZ* genes.**

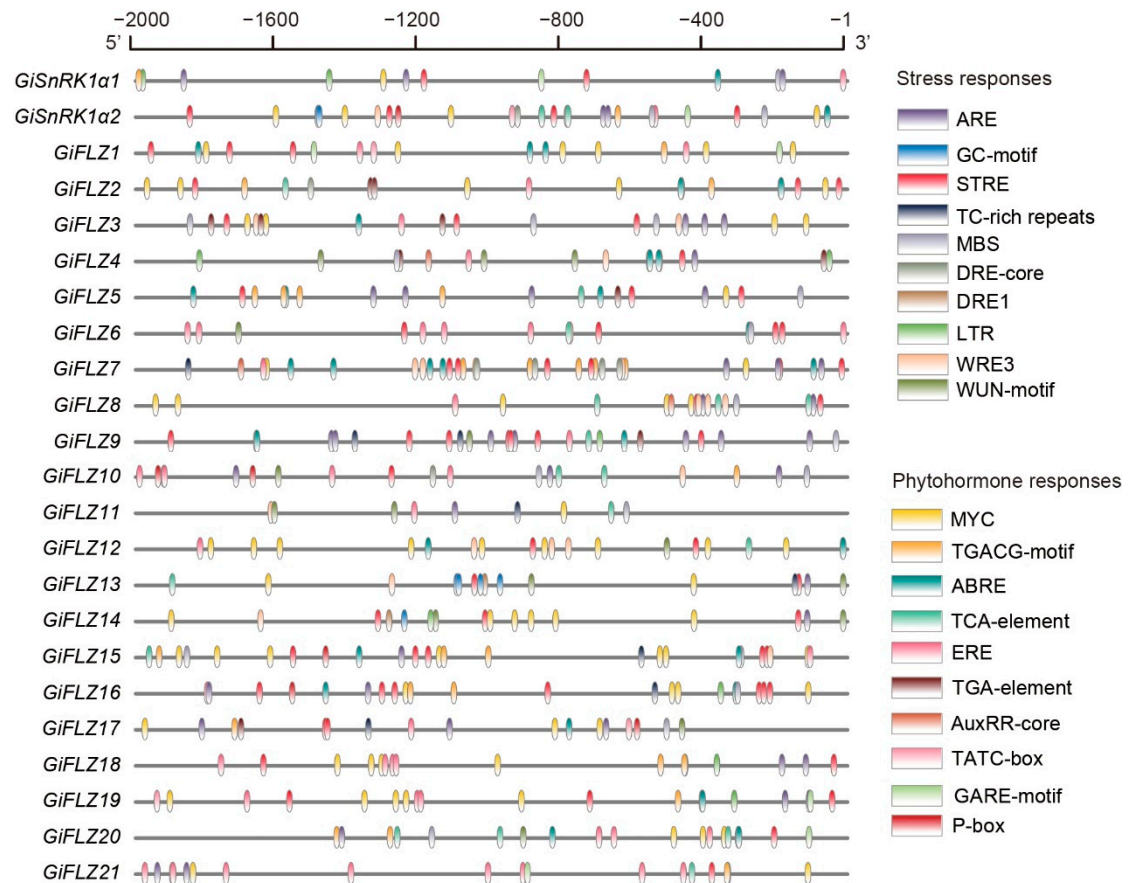

**Figure S3. An overview of the distribution of cis-elements in *GiSnRK1α* and *GiFLZ* gene promoters.** The promoter sequence (–2,000 bp) of the indicated genes was inferred on PlantCARE.

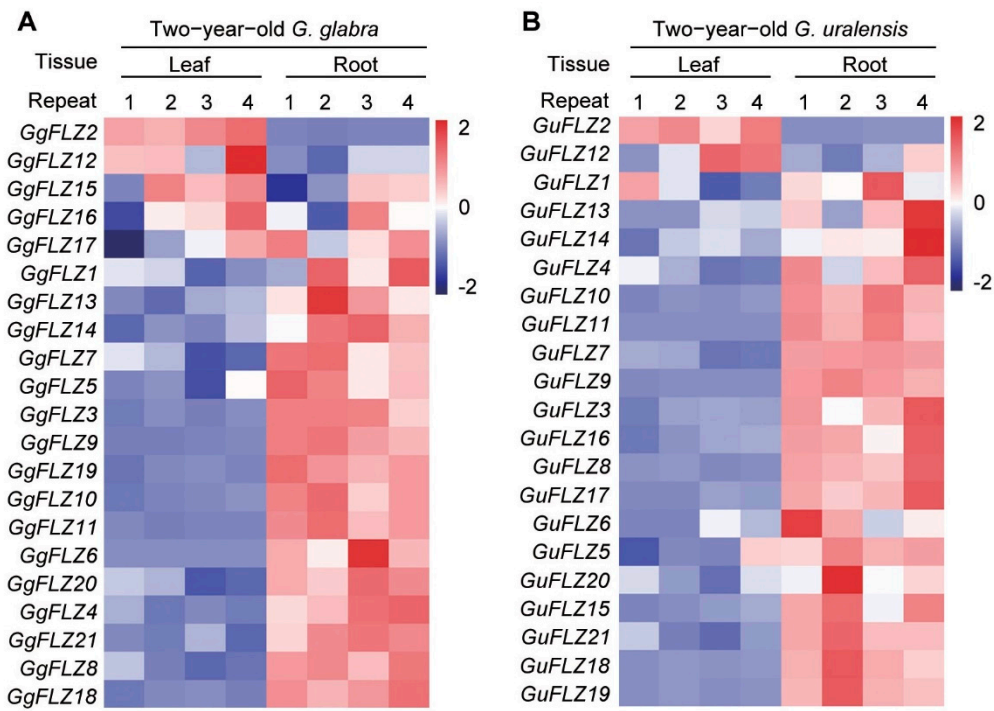

**Figure S4. Expression pattern of FLZ genes in roots and leaves of 2-year-old *G. glabra* (A) and *G. uralensis* (B) plants.** These expression data are normalized of FPKM and shown from low (blue) to high (red) for each gene.

**Table S1.** Primers used in this study.

| Primer name              | Sequence (5' to 3')                        | Usage      |
|--------------------------|--------------------------------------------|------------|
| GiSnRK1 $\alpha$ 1-Y2H-F | CAGTGAATTCCACCCGATGGATGAATCAACTGGCCA       | Y2H        |
| GiSnRK1 $\alpha$ 1-Y2H-R | TATCGATGCCCCACCCCTAGAGAACACGAAGCTGC        |            |
| GiFLZ2-Y2H-F             | CAGTGAATTCCACCCG ATGCTACCAAGCTTCATGAG      |            |
| GiFLZ2-Y2H-R             | TATCGATGCCCCACCC TTATATCCGGTTGATAATTT      |            |
| GiFLZ3-Y2H-F             | CAGTGAATTCCACCCG ATGCTGAGGAAGAGGAGCAG      |            |
| GiFLZ3-Y2H-R             | TATCGATGCCCCACCC CTATGTGTCTGTAGGAATGC      |            |
| GiFLZ4-Y2H-F             | CAGTGAATTCCACCCG ATGGCTGGGTCTACCAAAAAG     |            |
| GiFLZ4-Y2H-R             | TATCGATGCCCCACCC CTAAGCAGCAGCAACTGTTC      |            |
| GiFLZ9-Y2H-F             | CAGTGAATTCCACCCG ATGGCAGAAGATTCTGGTTG      |            |
| GiFLZ9-Y2H-R             | TATCGATGCCCCACCC TCATATTGGTCAATCCCAC       |            |
| GiFLZ10-Y2H-F            | CAGTGAATTCCACCCG ATGGGTGATAATAGCTCCCA      |            |
| GiFLZ10-Y2H-R            | TATCGATGCCCCACCC TTAAACTTCTGCTCCATCTA      |            |
| GiFLZ14-Y2H-F            | CAGTGAATTCCACCCG ATGATGTTGGGAAAGAGATC      |            |
| GiFLZ14-Y2H-R            | TATCGATGCCCCACCC CTAAAGGGCAACAATCCCAG      |            |
| GiFLZ15/16-Y2H-F         | CAGTGAATTCCACCCG ATGGTGGGTCTGAGTGTAGT      |            |
| GiFLZ15/16-Y2H-R         | TATCGATGCCCCACCC TCAGTAAGCAAAAAGCACCGG     |            |
| GiFLZ17-Y2H-F            | CAGTGAATTCCACCCG ATGCTGAAGAAGAAGGAACA      |            |
| GiFLZ17-Y2H-R            | TATCGATGCCCCACCC TTATTGGACACAAGCAGAC       |            |
| GiFLZ18-Y2H-F            | CAGTGAATTCCACCCG ATGTTGCTGGGGAAGAGACC      |            |
| GiFLZ18-Y2H-R            | TATCGATGCCCCACCC CTACAAGGCAATAGCCACGG      |            |
| GiFLZ21-Y2H-F            | CAGTGAATTCCACCCG ATGTTGCTTGGGAAGCGTCC      |            |
| GiFLZ21-Y2H-R            | TATCGATGCCCCACCC TCAAGTACAAGCTGCAGCGG      |            |
| GiSnRK1 $\alpha$ 1-GFP-F | GATTAACAGGGATCCCCCATGGATGAATCAACTGGCCAT    | GFP fusion |
| GiSnRK1 $\alpha$ 1-GFP-R | GAGACTAGTGGTACCCCCGAGAACACGAAGCTGCGAAAG    |            |
| GiFLZ2-GFP-F             | CTGATTAACAGGGATCCCCC ATGCTACCAAGCTTCATGAG  |            |
| GiFLZ2-GFP-R             | TCGAGACTAGTGGTACCCCC TATCCGGTTGATAATTTGCG  |            |
| GiFLZ3-GFP-F             | CTGATTAACAGGGATCCCCC ATGCTGAGGAAGAGGAGCAG  |            |
| GiFLZ3-GFP-R             | TCGAGACTAGTGGTACCCCC TGTGTCTGTAGGAATGCCTG  |            |
| GiFLZ4-GFP-F             | CTGATTAACAGGGATCCCCC ATGGCTGGGTCTACCAAAAAG |            |
| GiFLZ4-GFP-R             | TCGAGACTAGTGGTACCCCC AGCAGCAGCAACTGTTCTCTG |            |
| GiFLZ9-GFP-F             | CTGATTAACAGGGATCCCCC ATGGCAGAAGATTCTGGTTG  |            |
| GiFLZ9-GFP-R             | TCGAGACTAGTGGTACCCCC TATTGGTCAATCCCACCCT   |            |
| GiFLZ10-GFP-F            | CTGATTAACAGGGATCCCCC ATGGGTGATAATAGCTCCCA  |            |
| GiFLZ10-GFP-R            | TCGAGACTAGTGGTACCCCC AACTTCTGCTCCATCTAACA  |            |
| GiFLZ14-GFP-F            | CTGATTAACAGGGATCCCCC ATGATGTTGGGAAAGAGATC  |            |
| GiFLZ14-GFP-R            | TCGAGACTAGTGGTACCCCC AAGGGCAACAATCCCAGTTG  |            |
| GiFLZ15/16-GFP-F         | CTGATTAACAGGGATCCCCC ATGGTGGGTCTGAGTGTAGT  |            |
| GiFLZ15/16-GFP-R         | TCGAGACTAGTGGTACCCCC GTAAGCAAAAAGCACCGGTC  |            |
| GiFLZ17-GFP-F            | CTGATTAACAGGGATCCCCC ATGCTGAAGAAGAAGGAACA  |            |
| GiFLZ17-GFP-R            | TCGAGACTAGTGGTACCCCC TTTGGACACAAGCAGACCCA  |            |
| GiFLZ18-GFP-F            | CTGATTAACAGGGATCCCCC ATGTTGCTGGGGAAGAGACC  |            |
| GiFLZ18-GFP-R            | TCGAGACTAGTGGTACCCCC CAAGGCAATAGCCACGGTGG  |            |

|                           |                                           |         |
|---------------------------|-------------------------------------------|---------|
| GiFLZ21-GFP-F             | CTGATTAACAGGGATCCCCC ATGTTGCTTGGGAAGCGTCC |         |
| GiFLZ21-GFP-R             | TCGAGACTAGTGGTACCCCC AGTACAAGCTGCAGCGGTTT |         |
| GiSnRK1 $\alpha$ 1-qPCR-F | TGGGAACAAGGCAACAGTTC                      | qRT-PCR |
| GiSnRK1 $\alpha$ 1-qPCR-R | GAATTTCCAAGGTAATGATTAT                    |         |
| GiFLZ2-qPCR-F             | GAACAGACAAATAATTATGG                      |         |
| GiFLZ2-qPCR-R             | AAGTCTCTGCATTCTGAAGGT                     |         |
| GiFLZ3-qPCR-F             | CTCTGATGCTAATTTGGATA                      |         |
| GiFLZ3-qPCR-R             | TAGCATCTAGTGGAGAAGTG                      |         |
| GiFLZ4-qPCR-F             | CCGGGGTATTCTGGTCATAA                      |         |
| GiFLZ4-qPCR-R             | AACCGATGATGGGTTCTCTGA                     |         |
| GiFLZ9-qPCR-F             | ATGGCAGAAGATTCTGGTTG                      |         |
| GiFLZ9-qPCR-R             | GCTCATCATGGTTTCAGAAC                      |         |
| GiFLZ10-qPCR-F            | CAGAATTACGCTAGAAGTAC                      |         |
| GiFLZ10-qPCR-R            | ATAGCTTCGGTCCCTAATGG                      |         |
| GiFLZ13/14-qPCR-F         | AGACCATCACTAAGGTTTAC                      |         |
| GiFLZ13/14-qPCR-R         | TGTGTTTCTTCTGATAACAC                      |         |
| GiFLZ17-qPCR-F            | CTGATACATCAAGTCTAAGA                      |         |
| GiFLZ17-qPCR-R            | GTCTGCAATCAAGAGGAGAT                      |         |
| GiFLZ18/19-qPCR-F         | CCACGGAGGTTGTTGACAAC                      |         |
| GiFLZ18/19-qPCR-R         | CGGTGCTGCTGCTGTTAATA                      |         |
| GiFLZ21-qPCR-F            | CACGCAGATGCAGCAGACAA                      |         |
| GiFLZ21-qPCR-R            | GCATGATGTGGATCTTTACT                      |         |
| GiCS-qPCR-F               | GCTCAGCCGTTGACCCAG                        |         |
| GiCS-qPCR-R               | CACCACCAGGAAAAGCACC                       |         |

---
